# Supplementary material for: Efficient synthesis of copillar[5]arenes and their host–guest properties with dibromoalkanes
Source: Royal Society of Chemistry journal article supplement (doi:10.1039/c1ob05871a), 2011-01-01
Supplement: c1ob05871a.pdf [file c1ob05871a.pdf]

# Efficient Synthesis of Copillar[5]arenes and Their Host–Guest Properties with Alkyl Bromide

**Luzhi Liu,<sup>a</sup> Derong Cao,<sup>\*a,b</sup> Yi Jin,<sup>a</sup> Hongqi Tao,<sup>a</sup> Yuhui Kou<sup>a</sup> and Herbert Meier<sup>\*c</sup>**

<sup>a</sup> *School of Chemistry and Chemical Engineering, South China University of Technology, Guangzhou 510641, China.*

<sup>b</sup> *State Key Laboratory of Luminescent Materials and Devices, South China University of Technology, Guangzhou 510640, China.*

<sup>c</sup> *Institute für Organische Chemie, Johannes Gutenberg-Universität Mainz, Duesbergweg 10-14, 55099 Mainz, Germany. Email: hmeier@uni-mainz.de*

## Supporting Information

### 1. Materials and methods

The 1,4-bis(ethoxy)pillar[6]arene was synthesized according to the literature procedure<sup>1</sup>. Solvents were either employed as purchased or dried according to the procedures described in the literatures. <sup>1</sup>H NMR (400 MHz) and <sup>13</sup>C NMR (100 MHz) spectra were recorded with a Bruker DRX 400 spectrometer by using CDCl<sub>3</sub> as solvent and TMS as an internal standard. Matrix-assisted laser desorption ionization time-of flight (MALDI-TOF) mass measurements were performed with an Autoflex III smart-beam spectrometer. Thin layer chromatography was performed by using commercial Merck silica gel plates (GF254), and visualization was carried out at 254 nm.

Supplementary Material (ESI) for Organic & Biomolecular Chemistry  
This journal is (c) The Royal Society of Chemistry 2011

## 2. General Procedure for the preparation of copillar[5]arenes (**3b-i**)

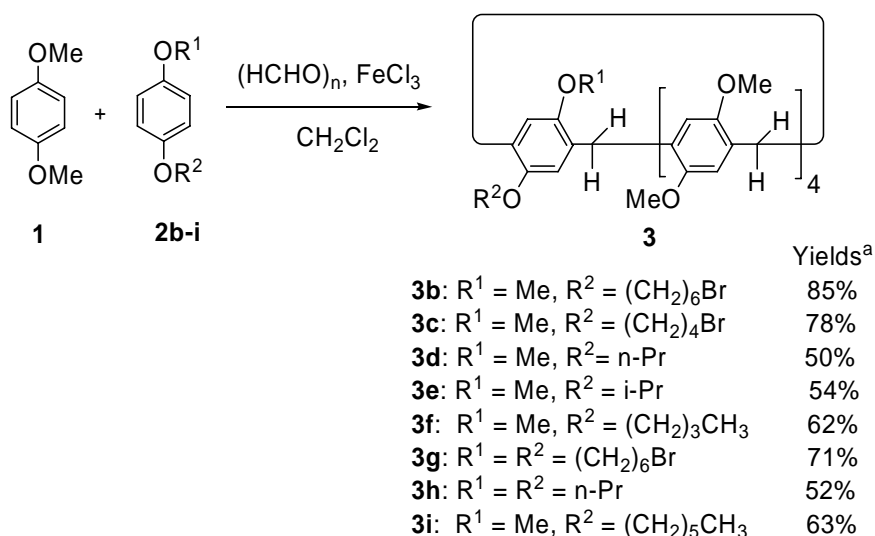

<sup>a</sup>isolated yields, calculated with the feed amounts of compounds **2b-i**.

*Scheme S1.* Preparation of pillar[5]arenes by oligomerization of different 1,4-dialkoxybenzenes.

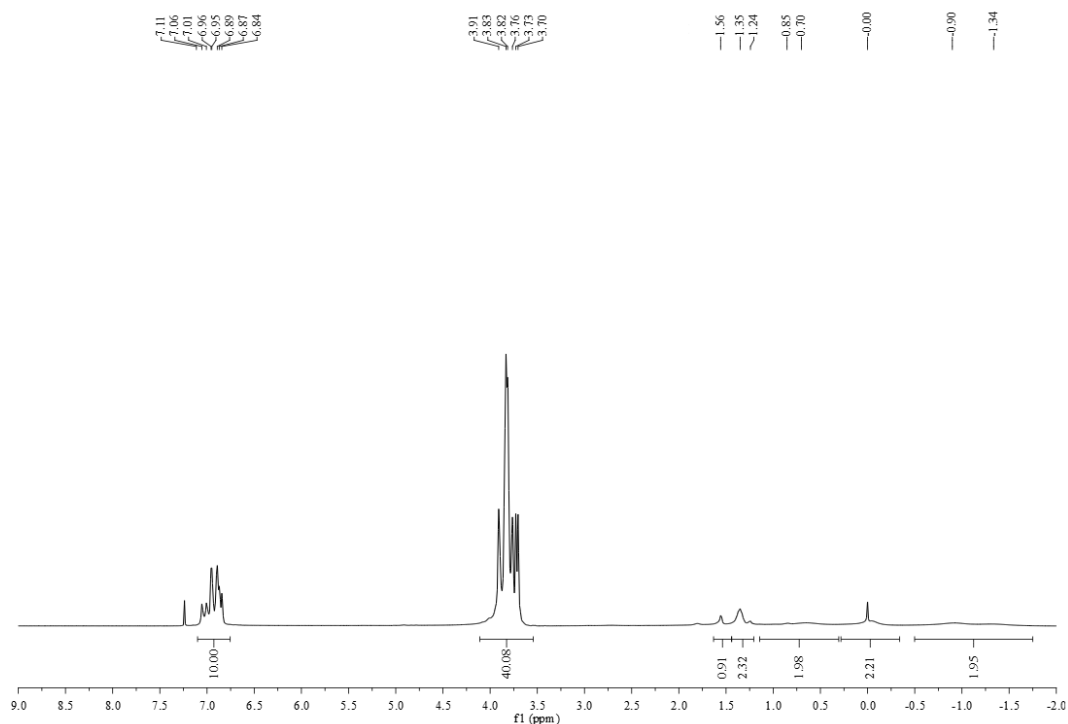

*Figure S1* <sup>1</sup>H NMR spectrum (CDCl<sub>3</sub>) of copillar[5]arene **3b**.

Supplementary Material (ESI) for Organic & Biomolecular Chemistry  
This journal is (c) The Royal Society of Chemistry 2011

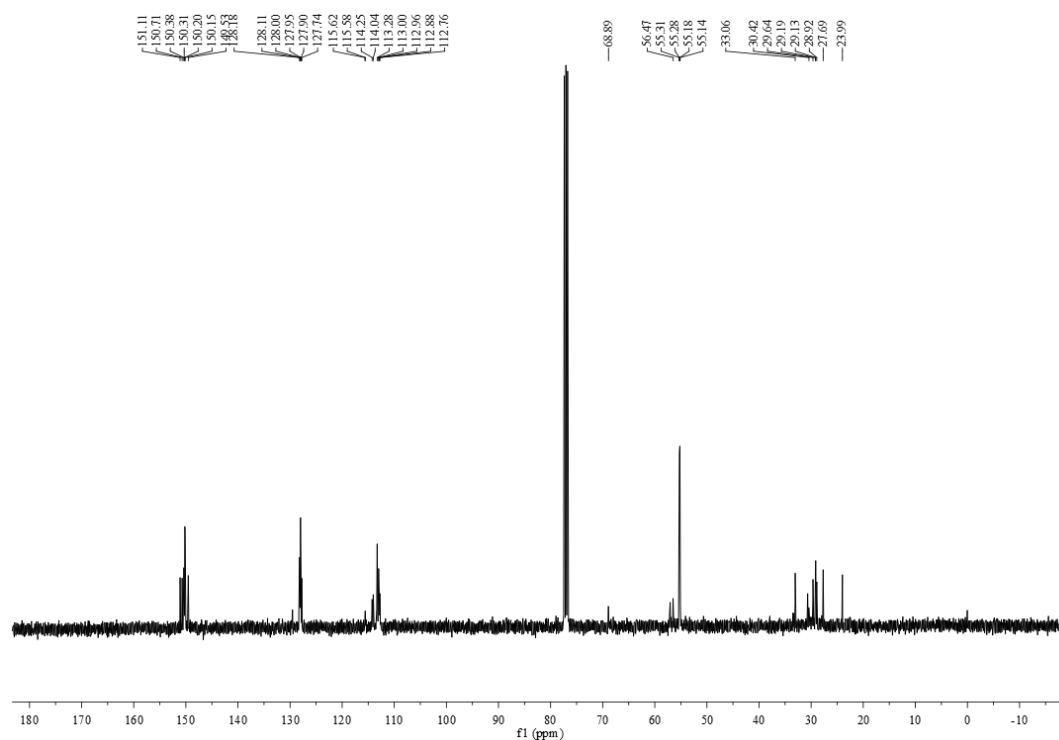

Figure S2  $^{13}\text{C}$  NMR spectrum ( $\text{CDCl}_3$ ) of copillar[5]arene **3b**.

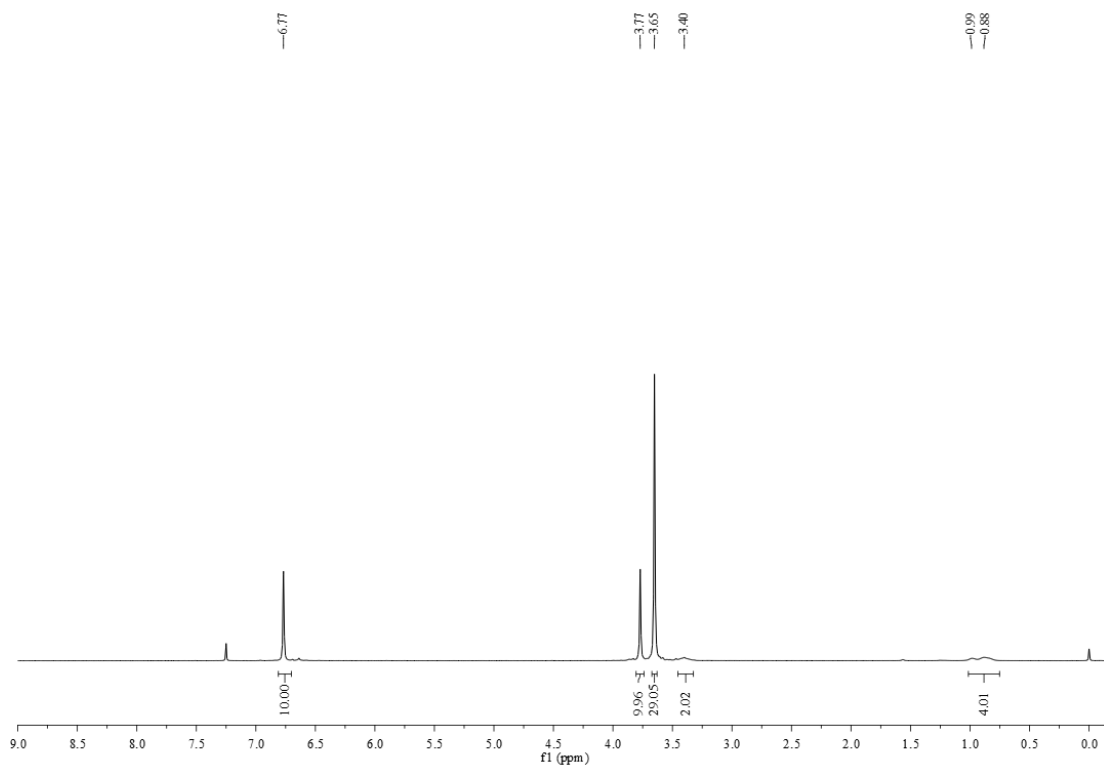

Figure S3  $^1\text{H}$  NMR spectrum ( $\text{CDCl}_3$ ) of copillar[5]arene **3c**

Supplementary Material (ESI) for Organic & Biomolecular Chemistry  
This journal is (c) The Royal Society of Chemistry 2011

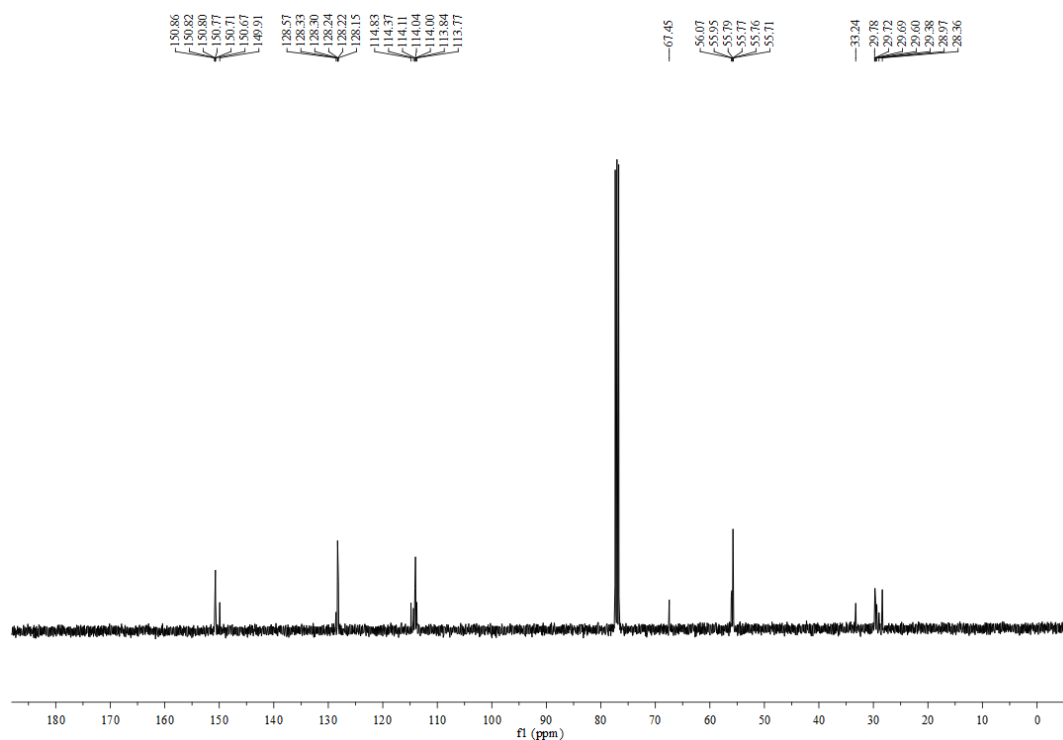

Figure S4  $^{13}\text{C}$  NMR spectrum ( $\text{CDCl}_3$ ) of copillar[5]arene **3c**.

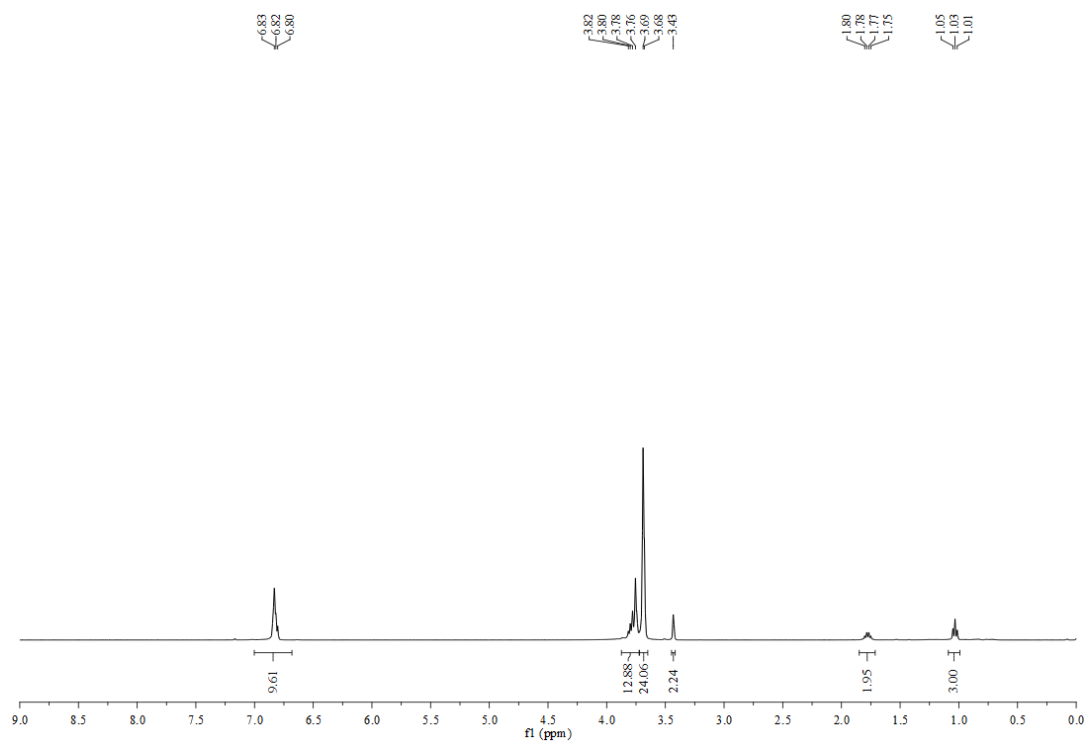

Figure S5  $^1\text{H}$  NMR spectrum ( $\text{CDCl}_3$ ) of copillar[5]arene **3d**.

Supplementary Material (ESI) for Organic & Biomolecular Chemistry  
This journal is (c) The Royal Society of Chemistry 2011

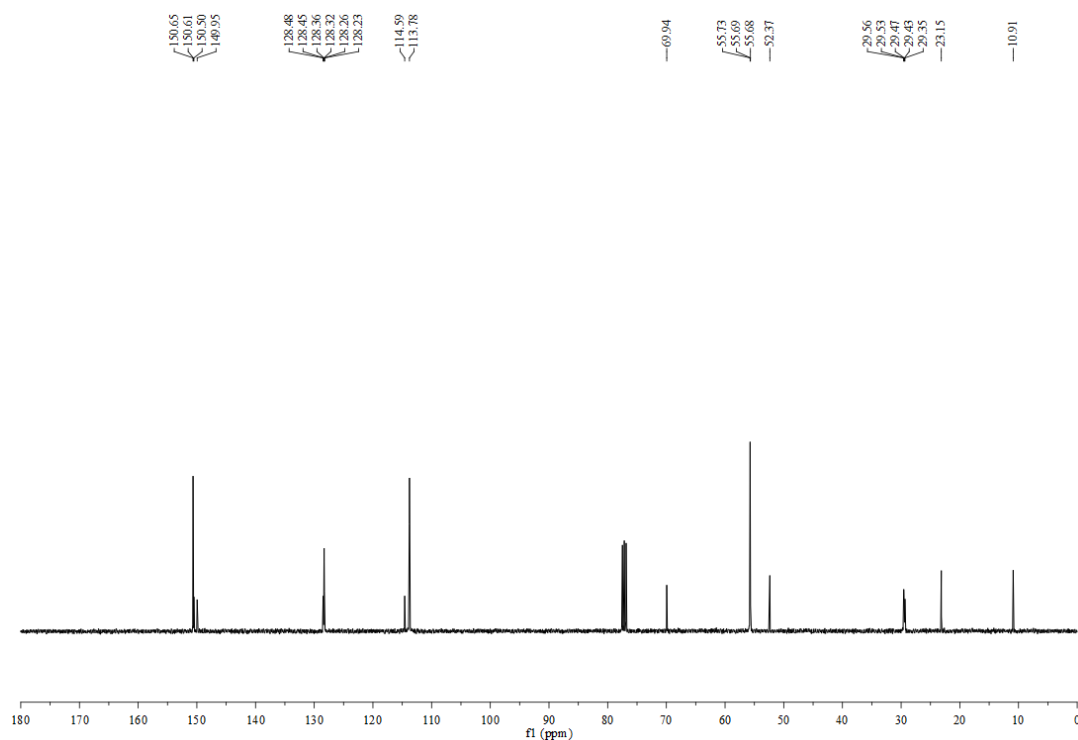

Figure S6  $^{13}\text{C}$  NMR spectrum ( $\text{CDCl}_3$ ) of copillar[5]arene **3d**.

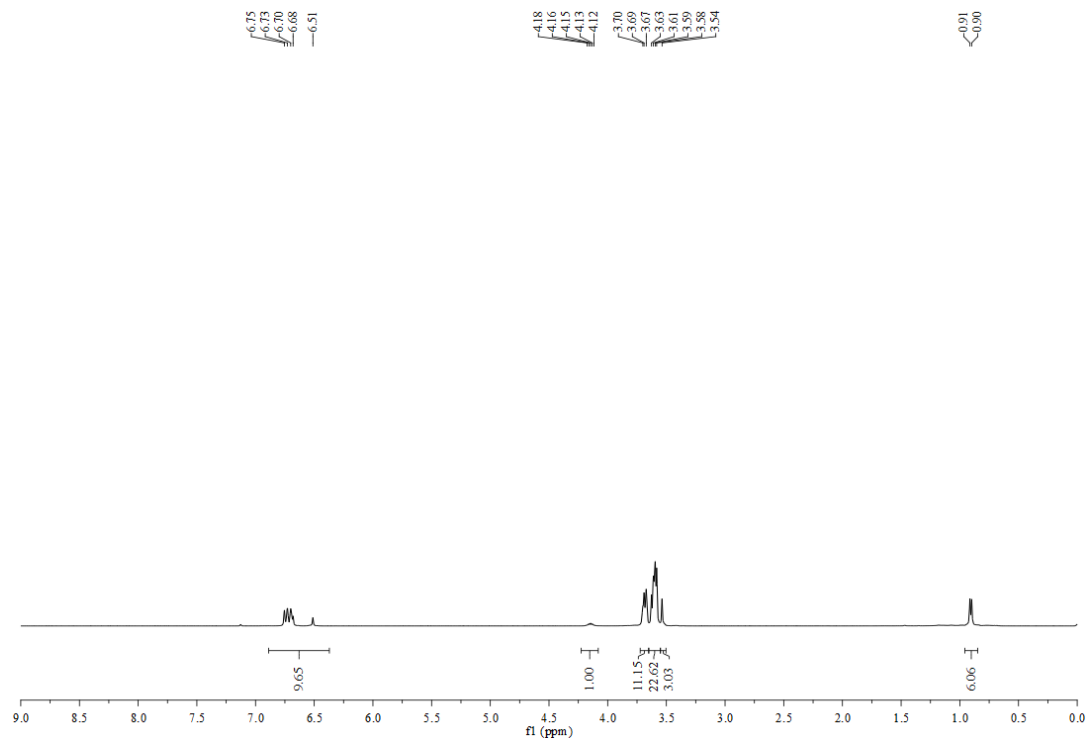

Figure S7  $^1\text{H}$  NMR spectrum ( $\text{CDCl}_3$ ) of copillar[5]arene **3e**.

Supplementary Material (ESI) for Organic & Biomolecular Chemistry  
This journal is (c) The Royal Society of Chemistry 2011

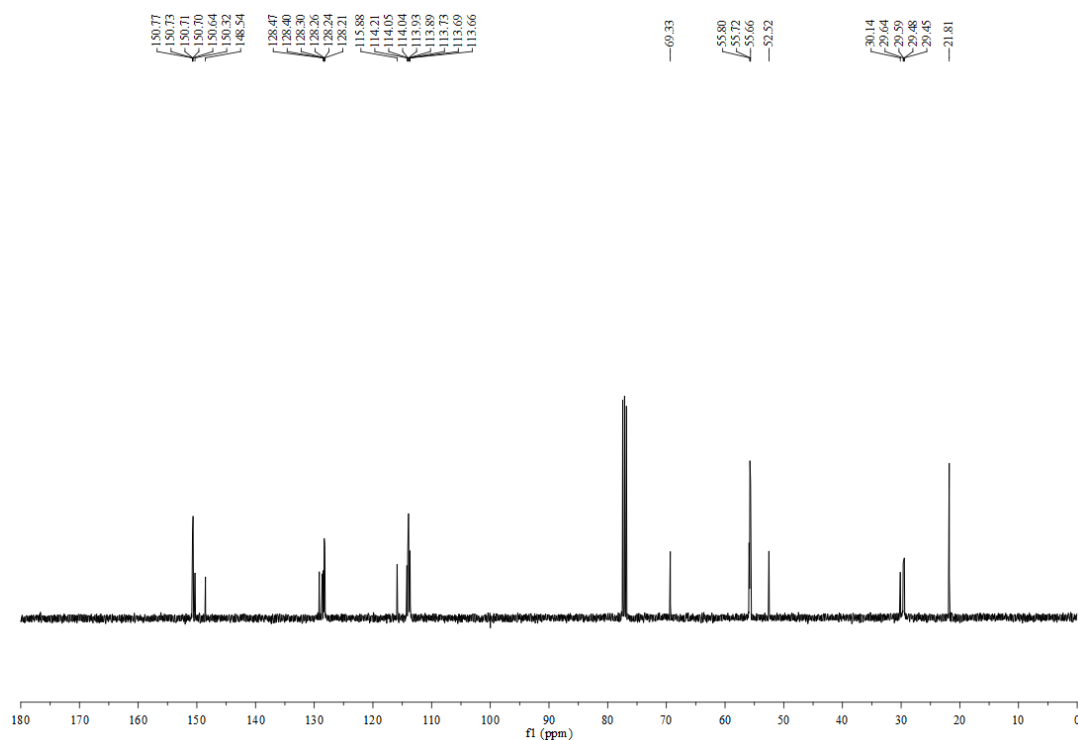

Figure S8  $^{13}\text{C}$  NMR spectrum ( $\text{CDCl}_3$ ) of copillar[5]arene **3e**.

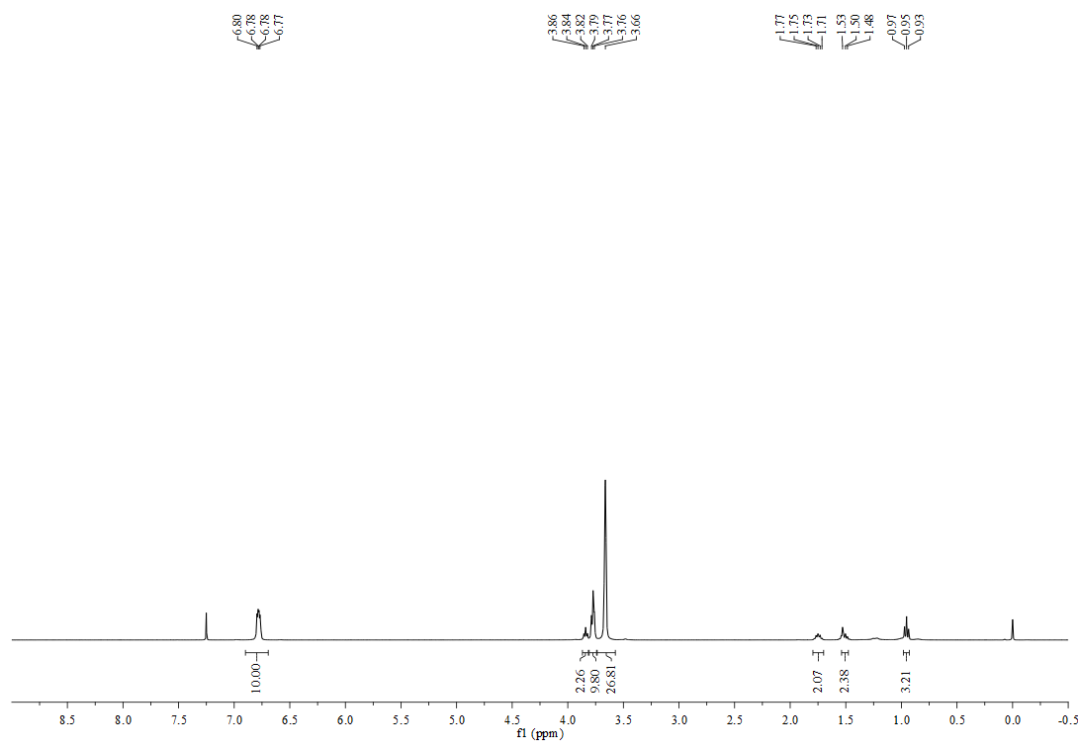

Figure S9  $^1\text{H}$  NMR spectrum ( $\text{CDCl}_3$ ) of copillar[5]arene **3f**.

Supplementary Material (ESI) for Organic & Biomolecular Chemistry  
This journal is (c) The Royal Society of Chemistry 2011

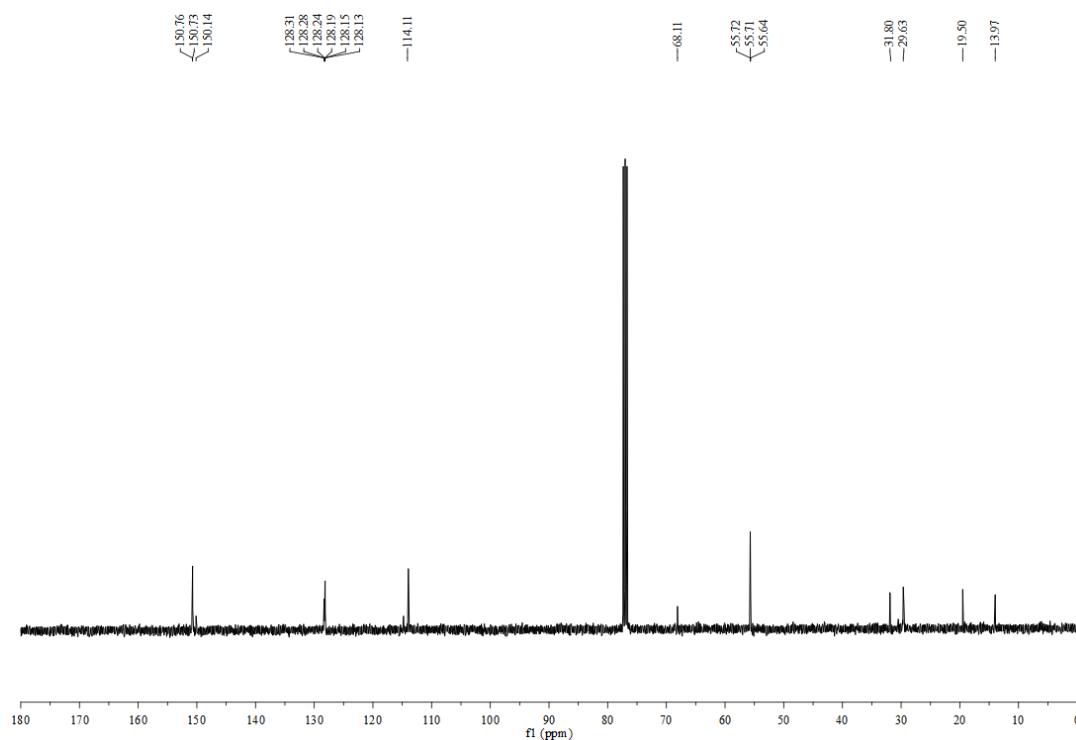

Figure S10  $^{13}\text{C}$  NMR spectrum ( $\text{CDCl}_3$ ) of copillar[5]arene **3f**.

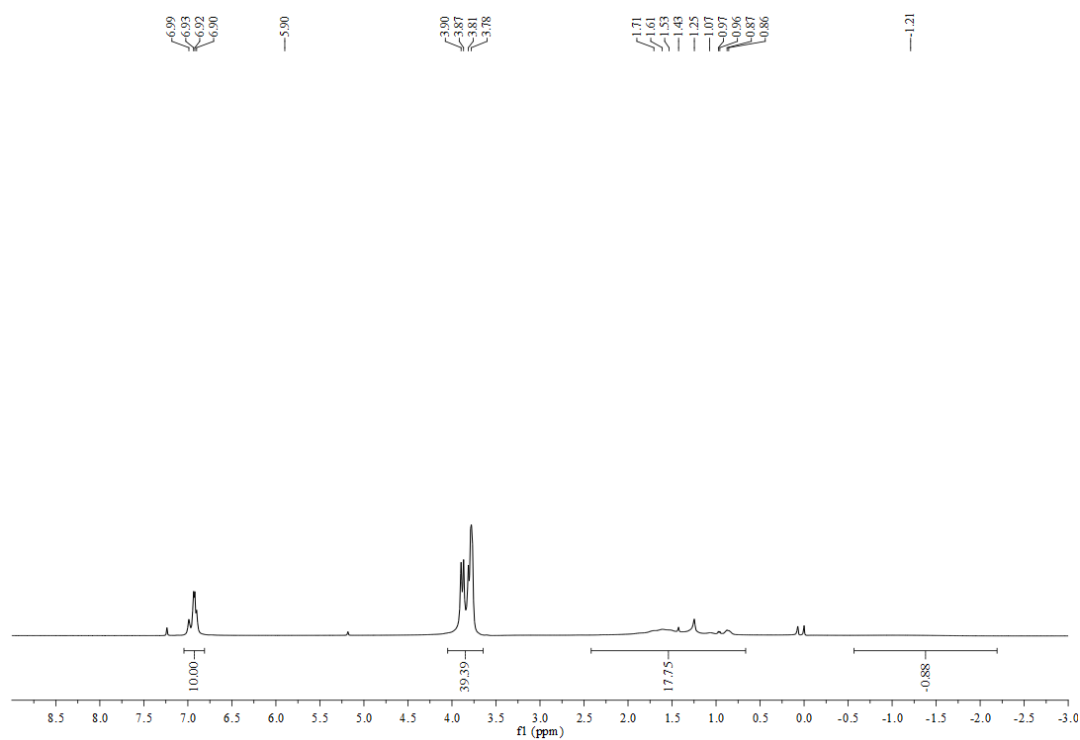

Figure S11  $^1\text{H}$  NMR spectrum ( $\text{CDCl}_3$ ) of copillar[5]arene **3g**.

Supplementary Material (ESI) for Organic & Biomolecular Chemistry  
This journal is (c) The Royal Society of Chemistry 2011

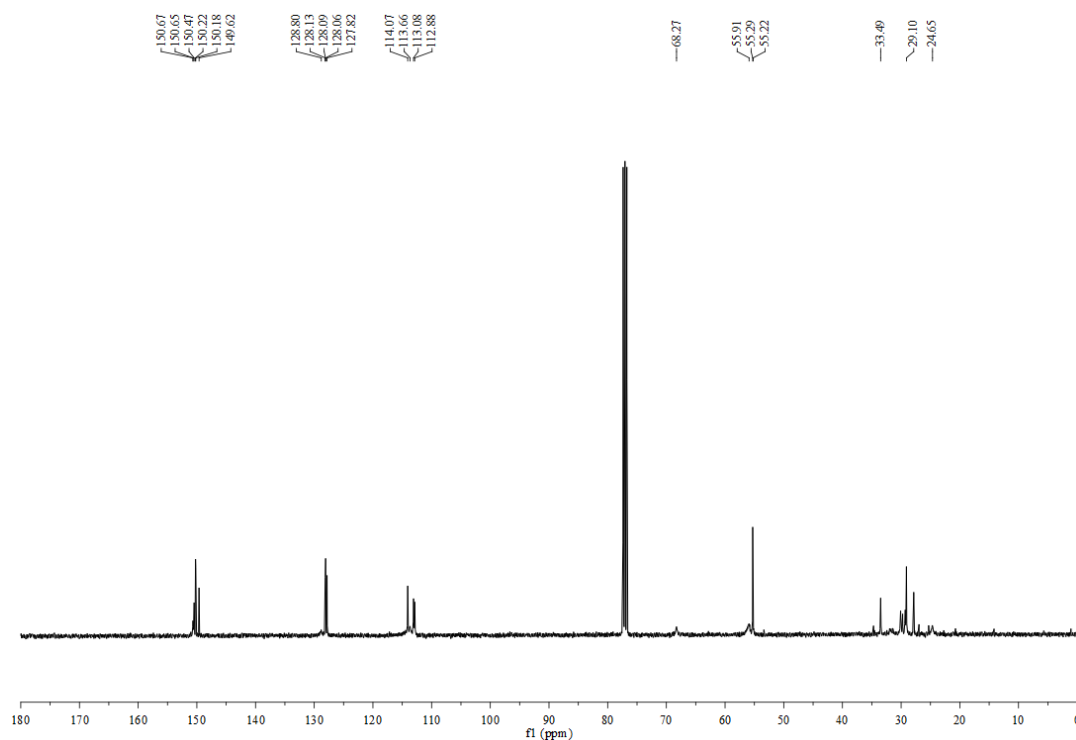

Figure S12  $^{13}\text{C}$  NMR spectrum ( $\text{CDCl}_3$ ) of copillar[5]arene **3g**.

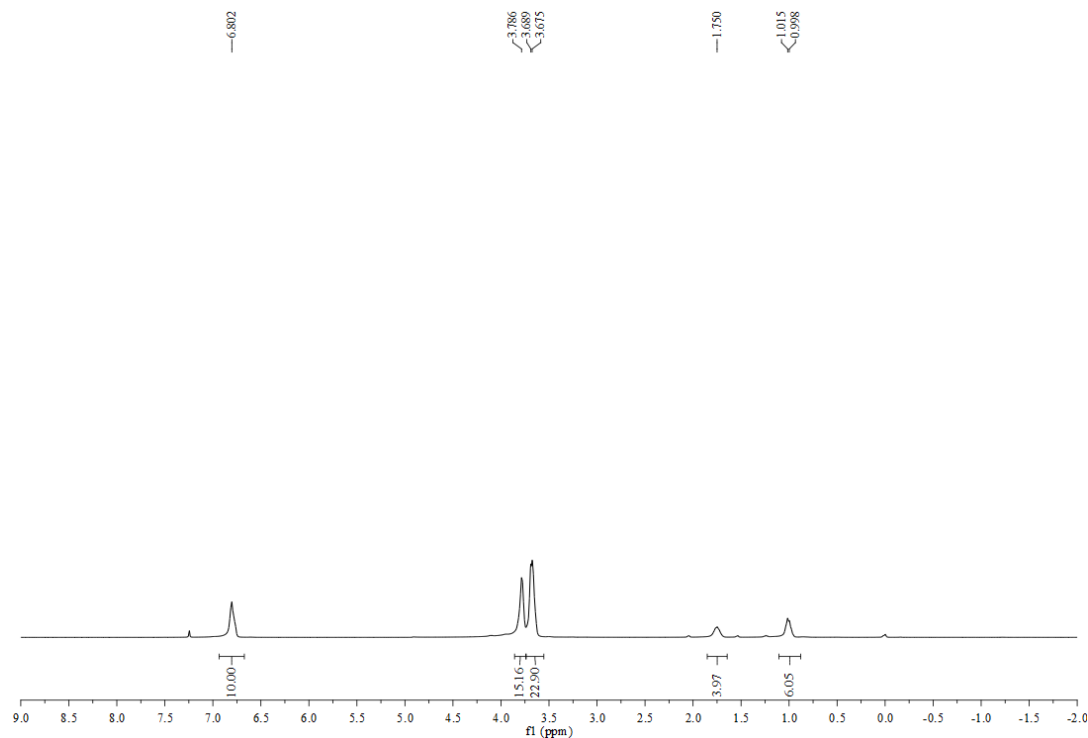

Figure S13  $^1\text{H}$  NMR spectrum ( $\text{CDCl}_3$ ) of copillar[5]arene **3h**.



Supplementary Material (ESI) for Organic & Biomolecular Chemistry  
This journal is (c) The Royal Society of Chemistry 2011

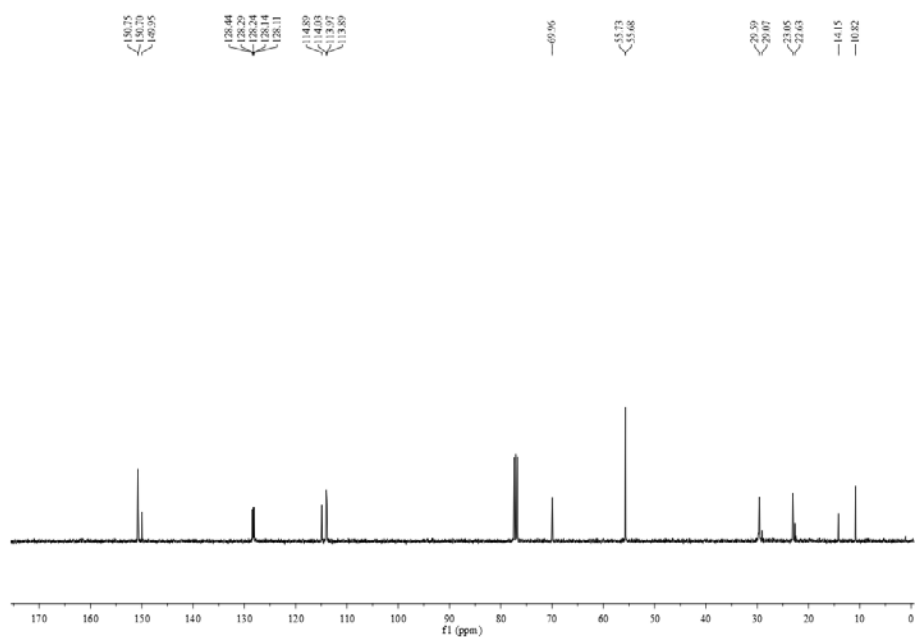

Figure S14  $^{13}\text{C}$  NMR spectrum ( $\text{CDCl}_3$ ) of copillar[5]arene **3h**.

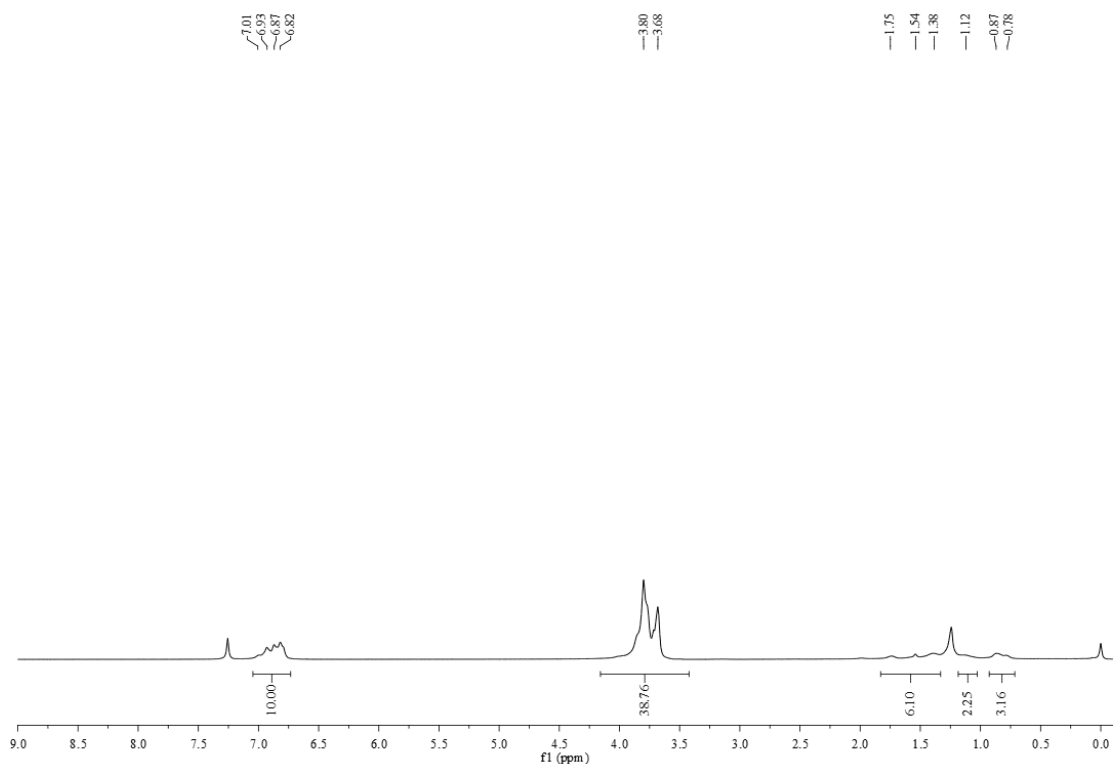

Figure S15  $^1\text{H}$  NMR spectrum ( $\text{CDCl}_3$ ) of copillar[5]arene **3i**.

Supplementary Material (ESI) for Organic & Biomolecular Chemistry  
This journal is (c) The Royal Society of Chemistry 2011

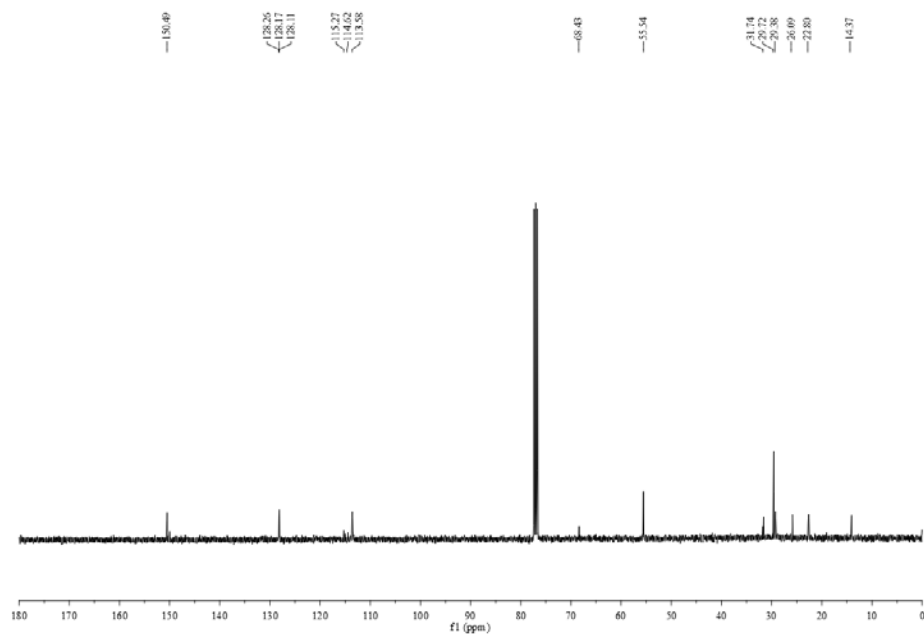

Figure S16  $^{13}\text{C}$  NMR spectrum ( $\text{CDCl}_3$ ) of copillar[5]arene **3i**.

Supplementary Material (ESI) for Organic & Biomolecular Chemistry  
This journal is (c) The Royal Society of Chemistry 2011

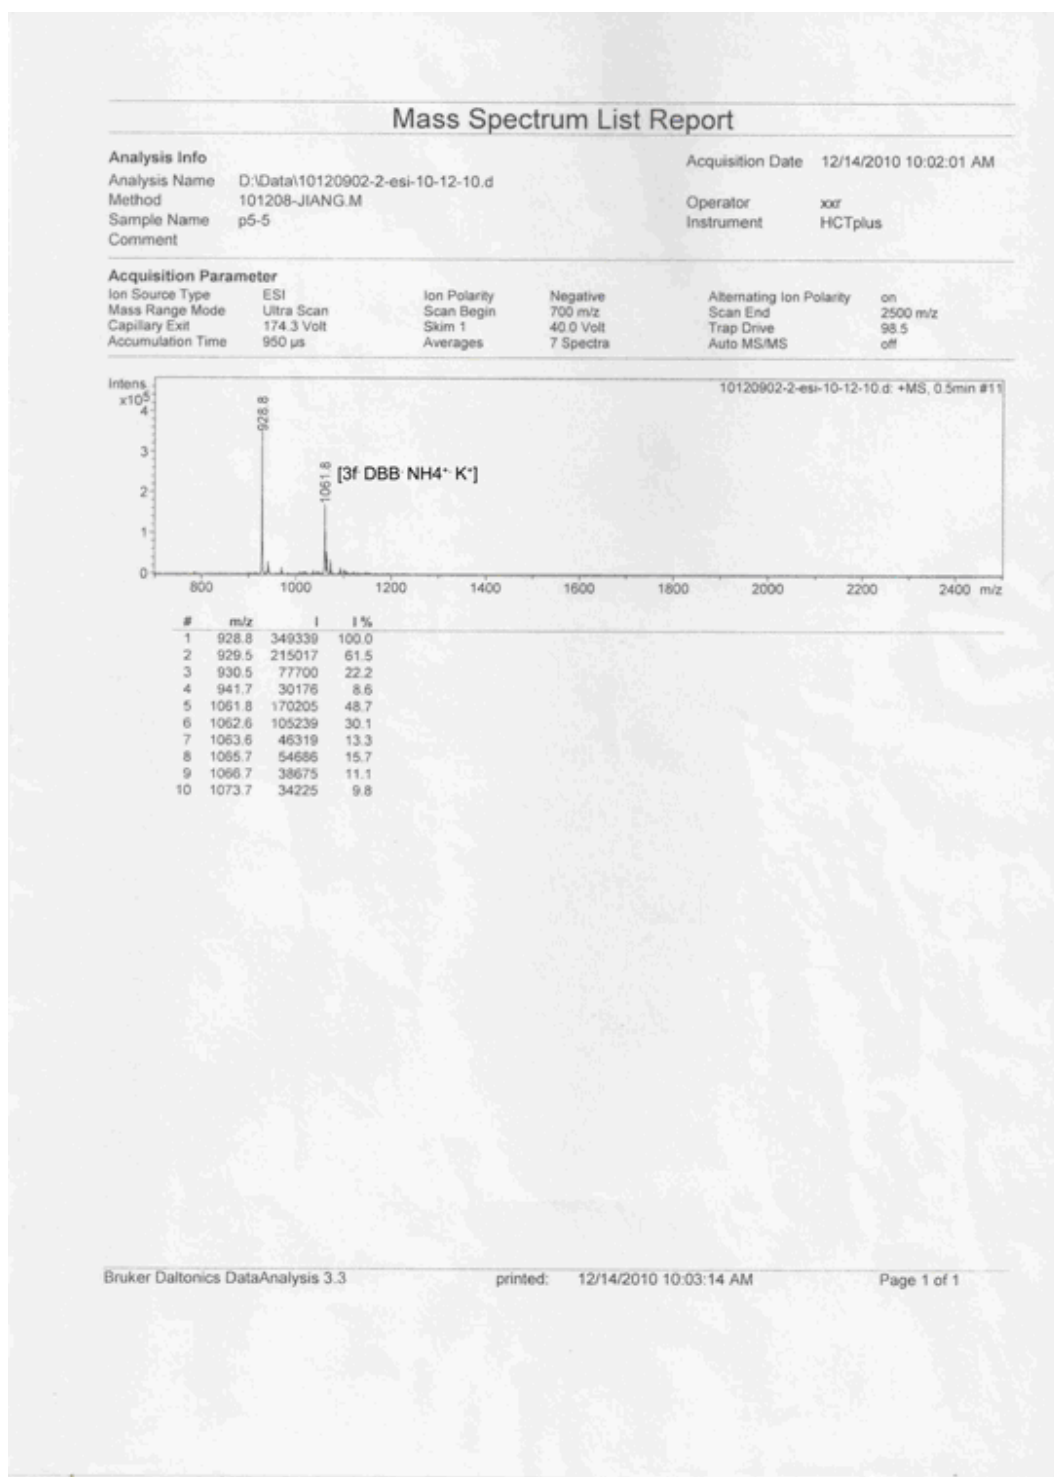

Figure S17 Mass (ESI) spectra of an equimolar mixture of **3f** and DBB

## References

- 1 D. Cao, Y. Kou, J. Liang, Z. Chen, L. Wang and H. Meier, *Angew. Chem. Int. Ed.*, 2009, **48**, 9721-9723.
